# Supplementary material for: Quantitative Estimate Index for Early-Stage Screening of Compounds Targeting Protein-Protein Interactions
Source: Int J Mol Sci. 2021 Oct 10;22(20):10925. doi: 10.3390/ijms222010925 (PMC8539639; doi:10.3390/ijms222010925)
Supplement: Supplementary file 1 [file ijms-22-10925-s001.zip › ijms-1398555-Sup-for proof-authoredited.pdf]

# Supplementary Materials

## Quantitative Estimate Index for Early-Stage Screening of Compounds Targeting Protein-Protein Interactions

Takatsugu Kosugi and Masahito Ohue\*

Department of Computer Science, School of Computing, Tokyo Institute of Technology

\* Correspondence: ohue@c.titech.ac.jp; Tel.: +81-45-924-5522

### 1. SUPPLEMENTARY FIGURES

These figures are receiver operating characteristic (ROC) and Precision-Recall curves for quantitative estimate of protein-protein interaction targeting drug-likeness (QEPPI),  $1 - \text{QED}$ , and quantitative estimate of drug-likeness (QED) calculated using the dataset of 1609 compounds before the removal of 13 protein-protein interaction (PPI) target compounds when creating the FDA dataset. (See Methods)

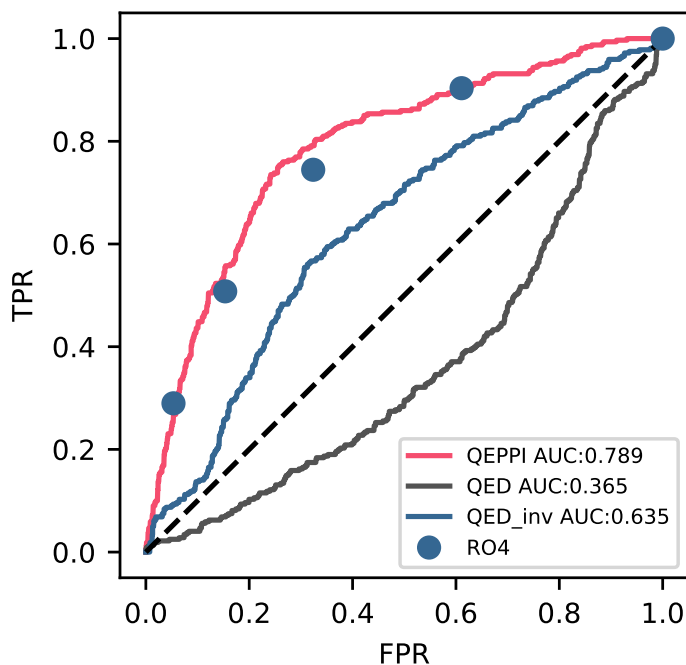

**Figure. S1.** Comparison of quantitative estimate of protein-protein interaction targeting drug-likeness (QEPPI) with other measures of drug-like properties in receiver operating characteristic (ROC) curves using a dataset of 1609 compounds without the removal of 13 approved protein-protein interaction (PPI)-targeting drugs from the FDA dataset. All ROC curves show that the true positive rate against the false positive rate describes the differences in performance for classifying compounds as PPI-targeting compounds. The red, black, and blue lines represent the ROC curves for QEPPI, quantitative estimate of drug-likeness (QED), and  $1 - \text{QED}$  (QED\_inv), respectively. The five blue dots are plotted as points that allowed 0 to 4 violations of Rule-of-Four (RO4). The dashed black line represents a random prediction of the dataset.

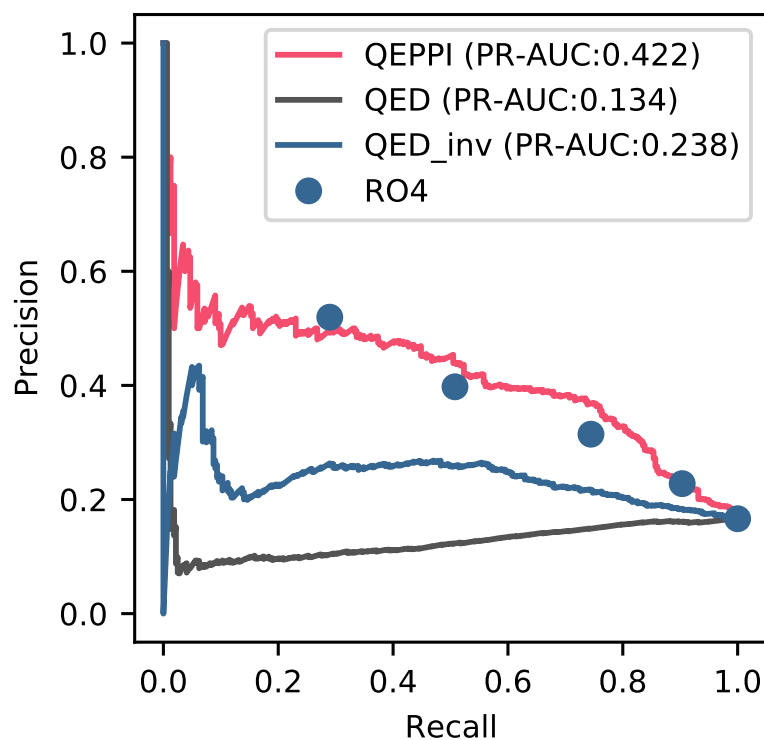

**Figure. S2.** Comparison of QEPPi with RO4 in Precision-Recall curve using a dataset of 1609 compounds without the removal of 13 approved PPI-targeting drugs from the FDA dataset. The Precision-Recall curve shows the precision against the recall value, which describes the differences in performance for classifying compounds as PPI-targeting compounds. The red, black, and blue lines represent the Precision-Recall curves for QEPPi, QED, and  $1 - \text{QED}$  (QED\_inv), respectively. The five blue dots represent the points that allowed 0 to 4 violations of RO4.

## 2. SUPPLEMENTARY TABLES

These tables are Confusion matrices, Precision, Recall, and F-score based on RO4 and QEPPi calculated using a dataset of 1609 compounds before removing 13 PPI target compounds when creating the FDA dataset. (See Methods)

**Table S1.** Confusion matrix based on RO4 with one violation.

|          | passed | failed |
|----------|--------|--------|
| positive | 163    | 158    |
| negative | 247    | 1,362  |

**Table S2.** Confusion matrix based on QEPPi scores with a threshold value of 0.5196.

|          | passed | failed |
|----------|--------|--------|
| positive | 236    | 85     |
| negative | 389    | 1,220  |

**Table S3.** Precision, Recall, and F-score values for one violation of RO4 and QEPPi scores with a threshold value of 0.5196.

|       | Precision | Recall | F-score |
|-------|-----------|--------|---------|
| RO4   | 0.398     | 0.508  | 0.446   |
| QEPPi | 0.378     | 0.735  | 0.499   |
