# Supplementary material for: Quantitative Estimate Index for Early-Stage Screening of Compounds Targeting Protein-Protein Interactions
Source: Int J Mol Sci. 2021 Oct 10;22(20):10925. doi: 10.3390/ijms222010925 (PMC8539639; doi:10.3390/ijms222010925)
Supplement: Supplementary file 1 [file ijms-22-10925-s001.zip › SupplementaryTablesS4-S8.xlsx]

## Sheet: front
Supplementary Materials
Quantitative Estimate Index for Early-Stage Screening of Compounds Targeting Protein-Protein Interactions
Takatsugu Kosugi and Masahito Ohue*
Department of Computer Science, School of Computing, Tokyo Institute of Technology
* Correspondence: ohue@c.titech.ac.jp
Supplemetary Table S4: Calculating QEPPI scores to Truong's dataset
Supplemetary Table S5: Statistics of QEPPI scores by PPI family in iPPI-DB
Supplemetary Table S6: Grouping Truoung's dataset with PPI targets
Supplemetary Table S7: Calculation of QEPPI to other type of PPI famlies compounds
Supplemetary Table S8: Calculation of QEPPI to SARS-CoV or SARS-CoV-2 targeting compounds

## Sheet: Table S4
Supplemetary Table S4: Calculating QEPPI scores to Truong's dataset
This table shows the QEPPI scores and year for the Truong approved dataset and the Truong clinical dataset. Year is defined for approved as the first marketing start identified in the DrugBank, and for clinical trials as the first clinical trial identified in ClinicalTrials.gov, EU Clinical Trials Register, or NIPH Clinical Trials Search in Japan.
approved/clinical trials	PPI_drug_name	Target	Year	QEPPI
approved	Avatrombopag	MPL/TPO	2018	0.550408
approved	Cabazitaxel	Microtubule	2010	0.157943
approved	Colchicine	Microtubule	1950	0.786522
approved	Dimethyl fumarate	KEAP1/NRF2	2013	0.174857
approved	Docetaxel	Microtubule	1995	0.0848758
approved	Eltrombopag	MPL/TPO	2008	0.7734
approved	Eribulin mesylate	Microtubule	2010	0.132874
approved	Everolimus	FKBP12/MTOR	2009	0.0705418
approved	Levetiracetam	CACNA1B	2000	0.167659
approved	Lifitegrast	ITGAL/ICAM1	2016	0.688468
approved	Lusutrombopag	MPL/TPO	2018	0.611509
approved	Maraviroc	CCR5/gp120	2007	0.837446
approved	Paclitaxel	Microtubule	1993	0.110396
approved	Pimecrolimus	FKBP12/CNA/CNB	2001	0.128016
approved	Plerixafor	CXCR4/CXCL12	2008	0.193147
approved	Romidepsin	HDAC	2009	0.140469
approved	Selinexor	CRM1/tumour suppressor proteins	2019	0.7846
approved	Rapamycin	FKBP12/MTOR	1999	0.0883551
approved	Tacrolimus	FKBP12/CNA/CNB	1994	0.103747
approved	Tafamidis	TTR tetramer	2015	0.602123
approved	Temsirolimus	FKBP12/MTOR	2007	0.0692756
approved	Tirofiban	FGG/ITGA2B/ITGB3	1998	0.402861
approved	Venetoclax	BCL2/BAX	2016	0.141385
approved	Vinblastine	Microtubule	1992	0.288161
approved	Vorinostat	HDAC	2006	0.38735
clinical trials	AMG-232	MDM2/p53	2017	0.70297
clinical trials	Apabetalone	Bromodomain/ histone	2012	0.850636
clinical trials	APG-115	MDM2/p53	2020	0.685955
clinical trials	ASTX660	XIAP/caspase-9	2020	0.726863
clinical trials	Birinapant	XIAP/caspase-9	2016	0.111727
clinical trials	Carotegrast methyl	α4-integrin	2019	0.591073
clinical trials	CCX140	CCR2	2010	0.758983
clinical trials	CCX354	CCR1	2010	0.692018
clinical trials	Cenicriviroc	CCR2/CCR5	2013	0.427787
clinical trials	CGM097	MDM2/p53	2021	0.57579
clinical trials	CPI-0610	BET proteins	2018	0.809775
clinical trials	CUDC-427	XIAP/caspase-9	2016	0.495488
clinical trials	Epothilone B	Microtubule	2005	0.37495
clinical trials	Idasanutlin	MDM2/p53	2014	0.786284
clinical trials	LCL161	XIAP/caspase-9	2012	0.798533
clinical trials	Milademetan	MDM2/p53	2014	0.478392
clinical trials	Navarixin	CXCR2	2006	0.840007
clinical trials	Navitoclax	BCL2/BAX	2007	0.208444
clinical trials	Obatoclax	BCL2/BAX	2013	0.524964
clinical trials	Pevonedistat	NAE	2013	0.571392
clinical trials	PF-4136309	CCR2	2012	0.670131
clinical trials	PRI-724	β-catenin/CBP	2017	0.477474
clinical trials	Reparixin	CXCR1/2	2005	0.433995
clinical trials	RG7112	MDM2/p53	2016	0.523706
clinical trials	RO6870810	BET proteins	2018	0.699608
clinical trials	SAR405838	MDM2/p53	2016	0.571381
clinical trials	Serdemetan	MDM2/p53	2010	0.567904
clinical trials	Siremadlin	MDM2/p53	2015	0.440467
clinical trials	Vercirnon	CCR9	2006	0.912831
clinical trials	Xevinapant	IAP	2013	0.644085

## Sheet: Table S5
Supplemetary Table S5: Statistics of QEPPI scores by PPI family in iPPI-DB
This table shows the summarized QEPPI scores of PPI families with 10 or more compounds registered in each PPI family in the iPPI-DB.
PPI target Families	QEPPI average	QEPPI median	QEPPI max	QEPPI min	Count
BAZ2-like PHD / H3	0.352713	0.321553	0.540583	0.149435	13
BCL2-Like / BAX	0.375212	0.274528	0.968261	0.0844518	326
Beta-catenin / TCF-4	0.77553	0.773484	0.867024	0.643954	40
Bromodomain / Histone	0.683616	0.693797	0.968836	0.199702	277
CD4 / gp120	0.777928	0.764088	0.948131	0.531676	119
CD80 / CD28	0.517445	0.530259	0.678714	0.245295	73
E2 / E1	0.659657	0.671399	0.929457	0.379145	10
IL2 / IL2R	0.36482	0.348906	0.733735	0.182091	18
LEDGF / IN	0.54911	0.569357	0.922083	0.261147	74
LFA / ICAM	0.705743	0.716833	0.982071	0.288767	277
MDM2-Like / P53	0.639776	0.639526	0.934064	0.212493	551
MENIN / MLL	0.795618	0.78387	0.940834	0.612992	20
MLLT1 / H3	0.811533	0.809499	0.932561	0.728672	19
PCNA trimer	0.650063	0.666237	0.763104	0.461739	10
SPIN1 / H3	0.590604	0.567226	0.857189	0.281256	26
Survivin dimer	0.697046	0.732772	0.91524	0.216922	32
TTR	0.431709	0.416089	0.846387	0.173407	50
VHL / HIF1α	0.661386	0.708331	0.937486	0.179985	16
WDR5/MLL	0.354633	0.165508	0.904709	0.15201	28
XIAP / Smac	0.677139	0.739416	0.984915	0.179281	272

## Sheet: Table S6
Supplemetary Table S6: Grouping Truoung's dataset with PPI targets
This table shows the QEPPI scores and molecular weights for the Truong approved dataset and the Truong clinical dataset and sorted by PPI target families.
approved/clinical traials	PPI_drug_name	Target	QEPPI	molecular weight
approved	Venetoclax	BCL2/BAX	0.141385	868.4
clinical trials	Navitoclax	BCL2/BAX	0.208444	974.6
clinical trials	Obatoclax	BCL2/BAX	0.524964	317.4
clinical trials	CPI-0610	BET proteins	0.809775	365.8
clinical trials	RO6870810	BET proteins	0.699608	540.1
clinical trials	Apabetalone	Bromodomain / Histone	0.850636	370.4
approved	Levetiracetam	CACNA1B	0.167659	170.2
clinical trials	CCX354	CCR1	0.692018	451.9
clinical trials	CCX140	CCR2	0.758983	495.9
clinical trials	PF-4136309	CCR2	0.670131	568.6
clinical trials	Cenicriviroc	CCR2/CCR5	0.427787	696.9
approved	Maraviroc	CCR5/gp120	0.837446	513.7
clinical trials	Vercirnon	CCR9	0.912831	444.9
approved	Selinexor	CRM1/tumour suppressor proteins	0.7846	443.3
clinical trials	Reparixin	CXCR1/2	0.433995	283.4
clinical trials	Navarixin	CXCR2	0.840007	397.4
approved	Plerixafor	CXCR4/CXCL12	0.193147	502.8
approved	Tirofiban	FGG/ITGA2B/ITGB3	0.402861	440.6
approved	Pimecrolimus	FKBP12/CNA/CNB	0.128016	810.4
approved	Tacrolimus	FKBP12/CNA/CNB	0.103747	804
approved	Everolimus	FKBP12/MTOR	0.0705418	958.2
approved	Rapamycin	FKBP12/MTOR	0.0883551	914.2
approved	Temsirolimus	FKBP12/MTOR	0.0692756	1030.3
approved	Romidepsin	HDAC	0.140469	540.7
approved	Vorinostat	HDAC	0.38735	264.3
clinical trials	Xevinapant	IAP	0.644085	561.7
approved	Lifitegrast	ITGAL/ICAM1	0.688468	615.5
approved	Dimethyl fumarate	KEAP1/NRF2	0.174857	144.1
clinical trials	AMG-232	MDM2/p53	0.70297	568.6
clinical trials	APG-115	MDM2/p53	0.685955	642.6
clinical trials	CGM097	MDM2/p53	0.57579	659.3
clinical trials	Idasanutlin	MDM2/p53	0.786284	616.5
clinical trials	Milademetan	MDM2/p53	0.478392	618.5
clinical trials	RG7112	MDM2/p53	0.523706	727.8
clinical trials	SAR405838	MDM2/p53	0.571381	562.5
clinical trials	Serdemetan	MDM2/p53	0.567904	328.4
clinical trials	Siremadlin	MDM2/p53	0.440467	555.4
approved	Cabazitaxel	Microtubule	0.157943	835.9
approved	Colchicine	Microtubule	0.786522	399.4
approved	Docetaxel	Microtubule	0.0848758	807.9
approved	Eribulin mesylate	Microtubule	0.132874	826
approved	Paclitaxel	Microtubule	0.110396	853.3
approved	Vinblastine	Microtubule	0.288161	811
clinical trials	Epothilone B	Microtubule	0.37495	507.7
approved	Avatrombopag	MPL/TPO	0.550408	649.7
approved	Eltrombopag	MPL/TPO	0.7734	442.5
approved	Lusutrombopag	MPL/TPO	0.611509	591.5
clinical trials	Pevonedistat	NAE	0.571392	443.5
approved	Tafamidis	TTR tetramer	0.602123	308.1
clinical trials	ASTX660	XIAP/caspase-9	0.726863	539.7
clinical trials	Birinapant	XIAP/caspase-9	0.111727	806.9
clinical trials	CUDC-427	XIAP/caspase-9	0.495488	564.7
clinical trials	LCL161	XIAP/caspase-9	0.798533	500.6
clinical trials	Carotegrast methyl	α4-integrin	0.591073	569.4
clinical trials	PRI-724	β-catenin/CBP	0.477474	658.6

## Sheet: Table S7
Supplemetary Table S7: Calculation of QEPPI to other type of PPI famlies compounds
This table shows the QEPPI scores for compounds targeting BCL6/SMRT or AKAP18δ/PKA.
Compound name	Target	SMILES	QEPPI
CID5721353	BCL6-positive lymphoma cell lines	C1=CC2=C(C=C1Br)C(=C3C(=O)N(C(=S)S3)C(CC(=O)O)C(=O)O)C(=O)N2	0.468428
FMP-API-1	AKAP18δ/PKA	C1=CC(=C(C=C1CC2=CC(=C(C=C2)O)N)N)O	0.410226

## Sheet: Table S8
Supplemetary Table S8: Calculation of QEPPI to SARS-CoV or SARS-CoV-2 targeting compounds
This table shows the QEPPI scores for compounds targeting SARS-CoV or SARS-CoV-2.
Compound name	Target	SMILES	QEPPI
SSAA09E2	SARS-CoV	CN1CCN(CC1)C2=CC=C(C=C2)CNC(=O)C3=CC=NO3	0.721159
VE607	SARS-CoV	OC(COC=1C=C(OCC(CN2CCCCC2)O)C=CC1)CN1CCCCC1	0.426546
HE602	SARS-CoV	C(C1=CC=CC=C1)OC=1C=C(C(=O)NC2=CC(=C(C=C2)Cl)C=2OC=3C(=NC=CC3)N2)C=CC1	0.701921
MP576	SARS-CoV	CC=1NC=2CCCC(C2C(C1C(=O)OCCC1=CC=CC=C1)C1=C(C=CC=C1)[N+](=O)[O-])=O	0.796635
Methylene blue	SARS-CoV-2	CN(C)C1=CC2=C(C=C1)N=C3C=CC(=[N+](C)C)C=C3S2.[Cl-]	0.216445
Diammonium Glycyrrhizinate	SARS-CoV-2	CC1(C2CCC3(C(C2(CCC1OC4C(C(C(C(O4)C(=O)O)O)O)OC5C(C(C(C(O5)C(=O)O)O)O)O)C)C(=O)C=C6C3(CCC7(C6CC(CC7)(C)C(=O)O)C)C)C)C.N.N	0.0576897
corilagin	SARS-CoV-2	C1C2C(C(C(C(O2)OC(=O)C3=CC(=C(C(=C3)O)O)O)O)OC(=O)C4=CC(=C(C(=C4C5=C(C(=C(C=C5C(=O)O1)O)O)O)O)O)O)O	0.150982
Arbidol	SARS-CoV-2	CCOC(=O)C1=C(N(C2=CC(=C(C(=C21)CN(C)C)O)Br)C)CSC3=CC=CC=C3	0.869006
Chloroquine	SARS-CoV-2	CCN(CC)CCCC(C)NC1=C2C=CC(=CC2=NC=C1)Cl	0.51932
P3	SARS-CoV-2	CN(C)CC1=CNC2=C1C=C(C=C2)OCC3=CC=CC=C3	0.458984
P2	SARS-CoV-2	CCC1=C2C(=CC=C1)C3=C(N2)C(OCC3)(CC)CC(=O)O	0.501819
P1	SARS-CoV-2	C(C1=CC=CC=C1)OC(=O)N1C(CC2=CC=CC=C12)CO	0.544219
